# Supplementary material for: Cellular and extracellular miRNAs are blood‐compartment‐specific diagnostic targets in sepsis
Source: PubMed Central journal article supplement (PMC5618677; doi:10.1111/jcmm.13162), 2017-04-06

**Supplemental Figure 2. Correlation of NGS and RT-qPCR log<sub>2</sub> fold changes for validated miRNAs.** miRNAs for RT-qPCR were chosen from NGS results based on the following criteria: same direction of regulation in all three compartments; only significantly regulated extracellularly (exosomes and serum); only significantly regulated cellularly counter-regulated in extracellular versus cellular compartments.

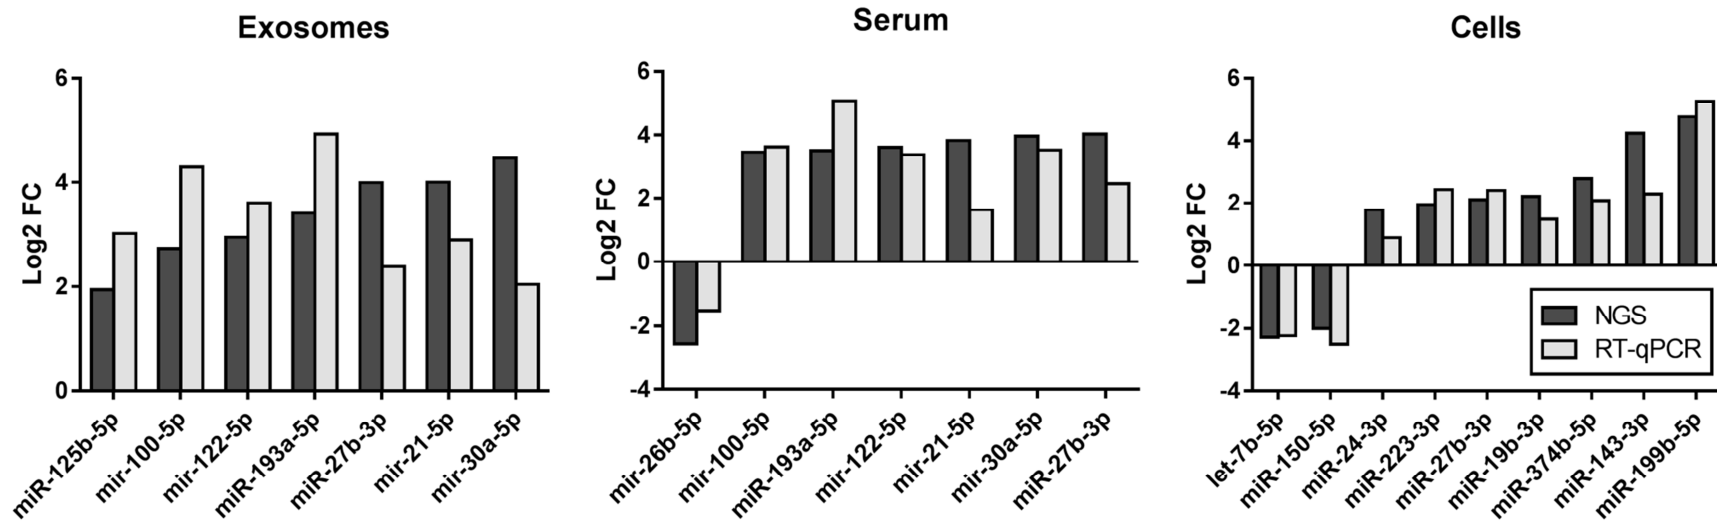

Supplement: JCMM-21-2403-s002.pdf [file JCMM-21-2403-s002.pdf]
