# Supplementary material for: Cellular and extracellular miRNAs are blood‐compartment‐specific diagnostic targets in sepsis
Source: PubMed Central journal article supplement (PMC5618677; doi:10.1111/jcmm.13162), 2017-04-06
Supplement: JCMM-21-2403-s003.pdf [file JCMM-21-2403-s003.pdf]

**Supplemental Figure 3. miRNAs differentiating between healthy volunteers and sepsis**

**patients.** Multiple miRNAs in exosomes, serum and cells were also able to differentiate ( $p < 0.05$ )

between healthy volunteers and sepsis patients.

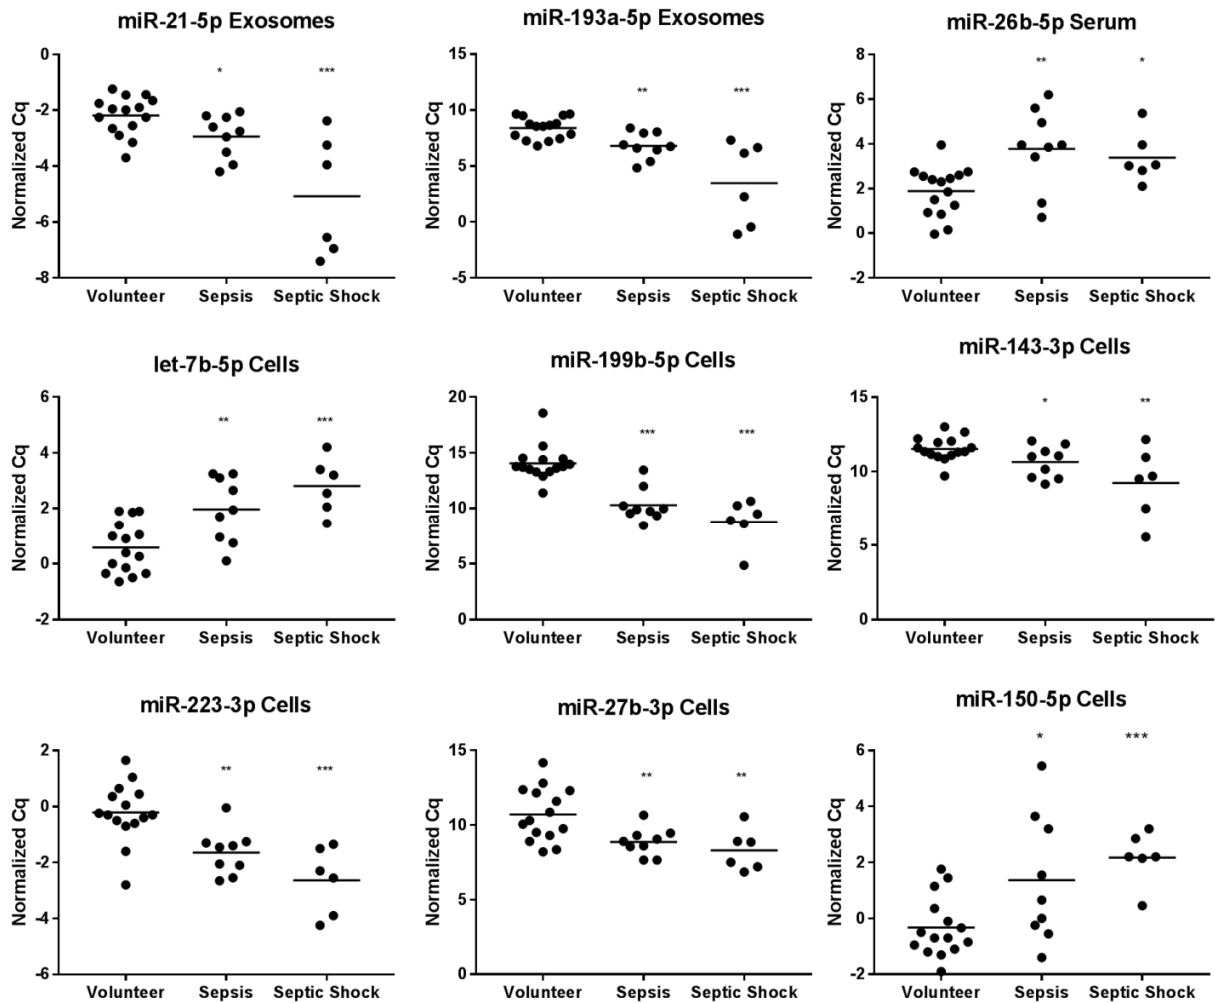

\* =  $p < 0.05$ ; \*\* =  $p < 0.01$ ; \*\*\* =  $p < 0.001$
