# Supplementary material for: Cellular and extracellular miRNAs are blood‐compartment‐specific diagnostic targets in sepsis
Source: PubMed Central journal article supplement (PMC5618677; doi:10.1111/jcmm.13162), 2017-04-06

**Supplemental Figure 4. Heat maps for the 5 Top Canonical Pathway networks.** Increasing IPA® pathway scores, which represent the negative log p-value, are depicted by increased shadowing of the rectangles of the heat map.

### A Pathogen Influenced Signaling

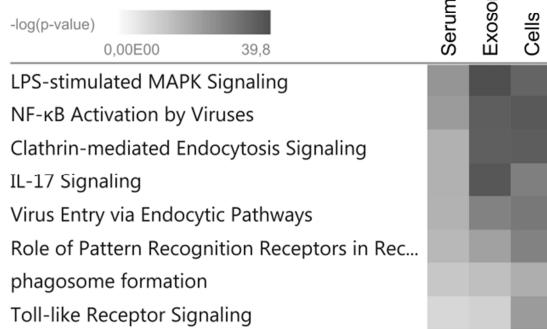

### B Cellular Immune Response

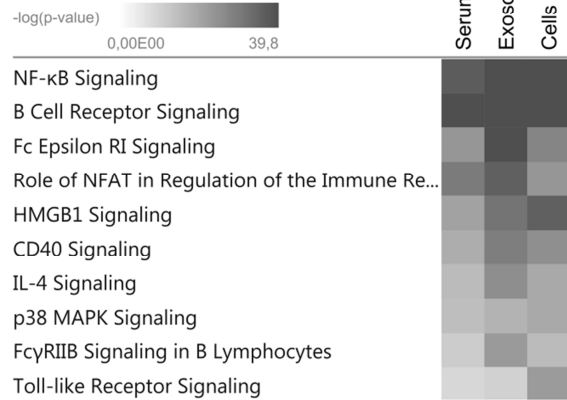

### C Humeral Immune Response

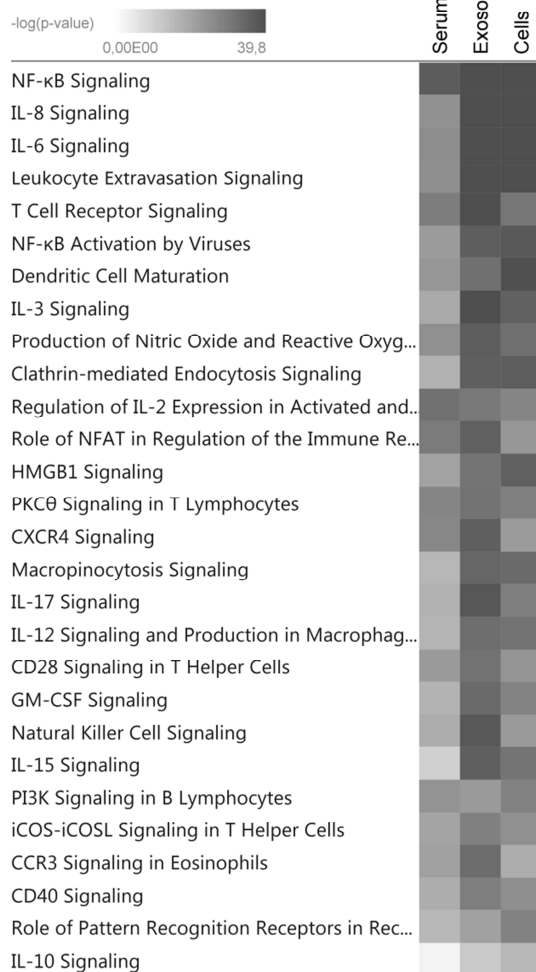

### D Cellular Stress Response and Injury

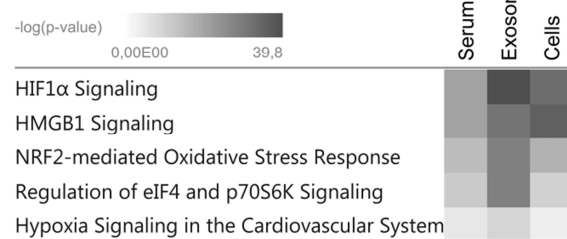

### E Cardiovascular Signaling

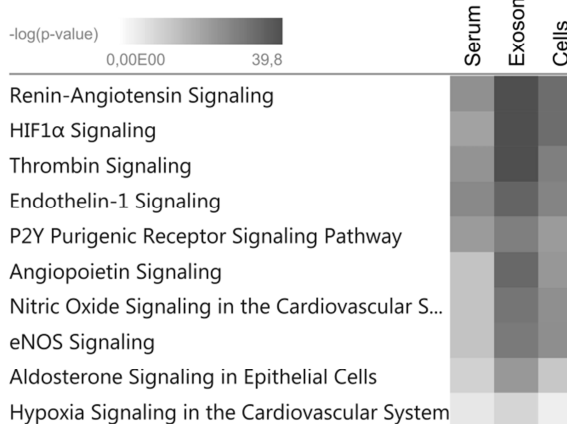

Supplement: JCMM-21-2403-s004.pdf [file JCMM-21-2403-s004.pdf]
