# Supplementary material for: Cellular and extracellular miRNAs are blood‐compartment‐specific diagnostic targets in sepsis
Source: PubMed Central journal article supplement (PMC5618677; doi:10.1111/jcmm.13162), 2017-04-06
Supplement: JCMM-21-2403-s006.pdf [file JCMM-21-2403-s006.pdf]

**Supplemental Table 2. Significantly regulated miRNAs in septic shock patients detected by NGS.**

|                                | <b>miRNA</b>                               | <b>Log<sub>2</sub>FC<sup>a</sup></b> | <b>Padj<sup>b</sup></b> |
|--------------------------------|--------------------------------------------|--------------------------------------|-------------------------|
| <b>Upregulated in exosomes</b> |                                            |                                      |                         |
|                                | <sup>d</sup> hsa-miR-21-3p                 | 1.60                                 | 0.0314                  |
|                                | hsa-miR-499a-5p                            | 1.93                                 | 0.0152                  |
|                                | <sup>d</sup> hsa-miR-125b-5p               | 1.94                                 | 0.0425                  |
|                                | hsa-miR-424-5p                             | 2.02                                 | 0.0092                  |
|                                | <b><i>hsa-miR-542-3p</i></b>               | <b>2.19</b>                          | <b>0.0146</b>           |
|                                | hsa-miR-378a-5p                            | 2.35                                 | 0.0321                  |
|                                | <sup>d</sup> <b><i>hsa-miR-30e-5p</i></b>  | <b>2.48</b>                          | <b>0.0343</b>           |
|                                | <b><i>hsa-miR-497-5p</i></b>               | <b>2.49</b>                          | <b>0.0039</b>           |
|                                | <sup>d</sup> <b><i>hsa-miR-148a-5p</i></b> | <b>2.58</b>                          | <b>0.0057</b>           |
|                                | <sup>d</sup> hsa-miR-30a-3p                | 2.59                                 | 0.0068                  |
|                                | <sup>c</sup> <b><i>hsa-miR-100-5p</i></b>  | <b>2.72</b>                          | <b>0.0156</b>           |
|                                | <b><i>hsa-miR-30d-3p</i></b>               | <b>2.75</b>                          | <b>0.0111</b>           |
|                                | <b><i>hsa-miR-335-5p</i></b>               | <b>2.76</b>                          | <b>0.0029</b>           |
|                                | <sup>c</sup> <b><i>hsa-miR-3591-3p</i></b> | <b>2.78</b>                          | <b>0.0257</b>           |
|                                | <b><i>hsa-miR-375</i></b>                  | <b>2.83</b>                          | <b>0.0251</b>           |
|                                | hsa-miR-34a-5p                             | 2.88                                 | 0.0216                  |
|                                | <sup>f</sup> hsa-miR-122-5p                | 2.94                                 | 0.0184                  |
|                                | <b><i>hsa-miR-125b-2-3p</i></b>            | <b>3.02</b>                          | <b>0.0146</b>           |
|                                | <b><i>hsa-miR-95-3p</i></b>                | <b>3.06</b>                          | <b>5.25E-03</b>         |
|                                | <b><i>hsa-miR-885-5p</i></b>               | <b>3.29</b>                          | <b>9.28E-03</b>         |

|                             |                                    |             |                 |
|-----------------------------|------------------------------------|-------------|-----------------|
|                             | <i><sup>c</sup>hsa-miR-193a-5p</i> | <b>3.40</b> | <b>3.74E-04</b> |
|                             | <sup>c</sup> hsa-miR-99a-5p        | 3.46        | 4.49E-03        |
|                             | hsa-miR-146b-3p                    | 3.54        | 9.62E-03        |
|                             | hsa-miR-193b-5p                    | 3.62        | 4.48E-03        |
|                             | <sup>c</sup> hsa-miR-210-3p        | 3.62        | 2.07E-03        |
|                             | <i><sup>c</sup>hsa-miR-378d</i>    | <b>3.70</b> | <b>2.88E-03</b> |
|                             | <i><sup>d</sup>hsa-miR-148a-3p</i> | <b>3.84</b> | <b>2.07E-03</b> |
|                             | <i>hsa-miR-548ah-3p</i>            | <b>3.84</b> | <b>4.49E-03</b> |
|                             | <i><sup>c</sup>hsa-miR-378c</i>    | <b>3.94</b> | <b>1.68E-03</b> |
|                             | <sup>d</sup> hsa-miR-194-5p        | 3.99        | 3.26E-03        |
|                             | <sup>f</sup> hsa-miR-27b-3p        | 3.99        | 2.07E-03        |
|                             | <sup>f</sup> hsa-miR-21-5p         | 4.00        | 1.67E-03        |
|                             | <sup>c</sup> hsa-miR-30a-5p        | 4.46        | 6.10E-04        |
|                             | <i><sup>c</sup>hsa-miR-452-5p</i>  | <b>5.63</b> | <b>7.45E-06</b> |
| <b>Upregulated in serum</b> |                                    |             |                 |
|                             | <sup>c</sup> hsa-miR-192-5p        | 3.21        | 0.0472          |
|                             | <i>hsa-miR-22-3p</i>               | <b>3.34</b> | <b>0.0464</b>   |
|                             | <i><sup>c</sup>hsa-miR-100-5p</i>  | <b>3.46</b> | <b>0.0343</b>   |
|                             | <i><sup>c</sup>hsa-miR-3591-3p</i> | <b>3.60</b> | <b>0.0464</b>   |
|                             | <sup>f</sup> hsa-miR-122-5p        | 3.61        | 0.0472          |
|                             | <i><sup>c</sup>hsa-miR-193a-5p</i> | <b>3.63</b> | <b>0.0003</b>   |
|                             | <i>hsa-miR-619-5p</i>              | <b>3.64</b> | <b>0.0245</b>   |
|                             | <sup>c</sup> hsa-miR-99a-5p        | 3.65        | 0.0245          |
|                             | <sup>c</sup> hsa-miR-21-5p         | 3.83        | 0.0312          |

|                                   |                                    |             |                 |
|-----------------------------------|------------------------------------|-------------|-----------------|
|                                   | <sup>c</sup> hsa-miR-210-3p        | 3.88        | 0.0024          |
|                                   | <sup>c</sup> hsa-miR-30a-5p        | 3.96        | 0.0120          |
|                                   | <sup>f</sup> hsa-miR-27b-3p        | 4.03        | 0.0207          |
|                                   | hsa-miR-378a-3p                    | 4.07        | 0.0028          |
|                                   | <sup>c</sup> <i>hsa-miR-378d</i>   | <b>4.23</b> | <b>0.0080</b>   |
|                                   | <i>hsa-miR-4488</i>                | <b>4.31</b> | <b>0.0017</b>   |
|                                   | <sup>c</sup> <i>hsa-miR-378c</i>   | <b>4.45</b> | <b>0.0050</b>   |
|                                   | <sup>c</sup> <i>hsa-miR-452-5p</i> | <b>6.06</b> | <b>4.09E-04</b> |
| <b>Upregulated in blood cells</b> |                                    |             |                 |
|                                   | hsa-miR-330-3p                     | 1.01        | 0.0325          |
|                                   | hsa-miR-23a-3p                     | 1.14        | 0.0205          |
|                                   | hsa-miR-106b-3p                    | 1.17        | 0.0264          |
|                                   | hsa-miR-421                        | 1.20        | 0.0256          |
|                                   | <i>hsa-miR-532-5p</i>              | <b>1.22</b> | <b>0.0084</b>   |
|                                   | <i>hsa-miR-7-5p</i>                | <b>1.23</b> | <b>0.0186</b>   |
|                                   | hsa-miR-103a-3p                    | 1.23        | 0.0353          |
|                                   | <i>hsa-miR-339-3p</i>              | <b>1.27</b> | <b>0.0350</b>   |
|                                   | <i>hsa-miR-4677-3p</i>             | <b>1.27</b> | <b>0.0184</b>   |
|                                   | <i>hsa-miR-4690-3p</i>             | <b>1.28</b> | <b>0.0410</b>   |
|                                   | hsa-miR-106b-5p                    | 1.29        | 0.0141          |
|                                   | <i>hsa-miR-3688-3p</i>             | <b>1.30</b> | <b>0.0258</b>   |
|                                   | <i>hsa-miR-3909</i>                | <b>1.32</b> | <b>0.0045</b>   |
|                                   | <i>hsa-miR-183-5p</i>              | <b>1.38</b> | <b>0.0296</b>   |
|                                   | <i>hsa-miR-581</i>                 | <b>1.43</b> | <b>0.0220</b>   |

|  |                                           |                    |                        |
|--|-------------------------------------------|--------------------|------------------------|
|  | hsa-miR-181a-3p                           | 1.43               | 0.0052                 |
|  | <b><i>hsa-miR-340-3p</i></b>              | <b><i>1.44</i></b> | <b><i>0.0144</i></b>   |
|  | hsa-miR-16-5p                             | 1.49               | 0.0095                 |
|  | hsa-miR-503-5p                            | 1.53               | 0.0100                 |
|  | hsa-let-7g-5p                             | 1.55               | 0.0233                 |
|  | <sup>d</sup> hsa-miR-21-3p                | 1.56               | 0.0307                 |
|  | hsa-let-7f-5p                             | 1.57               | 0.0073                 |
|  | hsa-miR-98-5p                             | 1.59               | 0.0182                 |
|  | hsa-miR-15b-3p                            | 1.61               | 0.0003                 |
|  | hsa-miR-30e-3p                            | 1.61               | 0.0009                 |
|  | <b><i>hsa-miR-10b-5p</i></b>              | <b><i>1.63</i></b> | <b><i>0.0002</i></b>   |
|  | <b><i>hsa-miR-142-5p</i></b>              | <b><i>1.65</i></b> | <b><i>0.0042</i></b>   |
|  | hsa-miR-182-5p                            | 1.66               | 0.0011                 |
|  | <sup>f</sup> hsa-miR-21-5p                | 1.71               | 0.0054                 |
|  | <b><i>hsa-miR-362-5p</i></b>              | <b><i>1.74</i></b> | <b><i>0.0070</i></b>   |
|  | hsa-miR-146b-5p                           | 1.78               | 0.0014                 |
|  | <b><i>hsa-miR-3074-5p</i></b>             | <b><i>1.79</i></b> | <b><i>0.0070</i></b>   |
|  | <b><i>hsa-miR-144-5p</i></b>              | <b><i>1.81</i></b> | <b><i>0.0353</i></b>   |
|  | <b><i>hsa-miR-152-3p</i></b>              | <b><i>1.85</i></b> | <b><i>0.0016</i></b>   |
|  | <sup>d</sup> hsa-miR-30a-3p               | 1.87               | 1.01E-04               |
|  | <sup>d</sup> <b><i>hsa-miR-30e-5p</i></b> | <b><i>1.88</i></b> | <b><i>3.15E-04</i></b> |
|  | <b><i>hsa-miR-99b-5p</i></b>              | <b><i>1.95</i></b> | <b><i>0.0212</i></b>   |
|  | <b><i>hsa-miR-1248</i></b>                | <b><i>1.96</i></b> | <b><i>0.0049</i></b>   |
|  | <sup>e</sup> hsa-miR-192-5p               | 1.99               | 3.69E-04               |
|  | <sup>e</sup> hsa-miR-223-3p               | 1.99               | 0.0025                 |

|  |                                            |             |                 |
|--|--------------------------------------------|-------------|-----------------|
|  | hsa-miR-24-3p                              | 2.04        | 0.0014          |
|  | hsa-miR-148b-3p                            | 2.06        | 6.13E-05        |
|  | hsa-miR-15b-5p                             | 2.07        | 0.0020          |
|  | <b><i>hsa-miR-660-5p</i></b>               | <b>2.09</b> | <b>4.03E-05</b> |
|  | <sup>d</sup> hsa-miR-194-5p                | 2.09        | 1.57E-05        |
|  | hsa-miR-96-5p                              | 2.10        | 3.33E-03        |
|  | <b><i>hsa-miR-618</i></b>                  | <b>2.12</b> | <b>3.04E-03</b> |
|  | hsa-miR-1290                               | 2.16        | 2.79E-03        |
|  | <b><i>hsa-miR-769-5p</i></b>               | <b>2.16</b> | <b>2.50E-03</b> |
|  | <b><i>hsa-miR-363-3p</i></b>               | <b>2.19</b> | <b>3.74E-04</b> |
|  | hsa-miR-451a                               | 2.22        | 7.08E-07        |
|  | <sup>f</sup> hsa-miR-27b-3p                | 2.22        | 0.0230          |
|  | <sup>e</sup> hsa-miR-26a-5p                | 2.27        | 2.75E-05        |
|  | <b><i>hsa-miR-450a-5p</i></b>              | <b>2.27</b> | <b>1.49E-04</b> |
|  | hsa-miR-145-5p                             | 2.29        | 0.0027          |
|  | hsa-miR-19b-3p                             | 2.29        | 3.89E-04        |
|  | <b><i>hsa-miR-548o-3p</i></b>              | <b>2.31</b> | <b>4.81E-05</b> |
|  | hsa-miR-29b-3p                             | 2.33        | 1.49E-04        |
|  | <b><i>hsa-miR-1246</i></b>                 | <b>2.34</b> | <b>4.71E-04</b> |
|  | <sup>d</sup> <b><i>hsa-miR-148a-5p</i></b> | <b>2.36</b> | <b>0.0014</b>   |
|  | hsa-miR-29a-3p                             | 2.43        | 1.23E-06        |
|  | hsa-miR-142-3p                             | 2.47        | 0.0025          |
|  | hsa-miR-215-5p                             | 2.54        | 6.59E-06        |
|  | <sup>d</sup> hsa-miR-374b-5p               | 2.78        | 2.71E-06        |
|  | hsa-miR-19a-3p                             | 3.11        | 1.64E-05        |

|                                  |                                     |              |                 |
|----------------------------------|-------------------------------------|--------------|-----------------|
|                                  | hsa-let-7a-3p                       | 3.19         | 2.71E-06        |
|                                  | hsa-let-7f-2-3p                     | 3.28         | 2.75E-05        |
|                                  | <sup>d</sup> <i>hsa-miR-148a-3p</i> | <b>3.41</b>  | <b>2.39E-09</b> |
|                                  | <i>hsa-miR-548e-3p</i>              | <b>3.47</b>  | <b>2.31E-07</b> |
|                                  | <sup>f</sup> hsa-miR-122-5p         | 3.59         | 2.15E-05        |
|                                  | <i>hsa-miR-340-5p</i>               | <b>3.89</b>  | <b>2.24E-11</b> |
|                                  | hsa-miR-143-3p                      | 4.45         | 1.76E-14        |
|                                  | <i>hsa-miR-199b-5p</i>              | <b>5.12</b>  | <b>1.01E-14</b> |
|                                  | <i>hsa-miR-582-3p</i>               | <b>6.25</b>  | <b>4.67E-15</b> |
| <b>Downregulated in exosomes</b> |                                     |              |                 |
|                                  | <sup>c</sup> <i>hsa-miR-4448</i>    | <b>-4.36</b> | <b>2.38E-04</b> |
|                                  | <sup>f</sup> hsa-let-7b-5p          | -3.52        | 7.45E-06        |
|                                  | <i>hsa-miR-323b-3p</i>              | <b>-3.35</b> | <b>0.0065</b>   |
|                                  | <sup>f</sup> hsa-let-7d-5p          | -3.35        | 0.0049          |
|                                  | <i>hsa-miR-4497</i>                 | <b>-3.20</b> | <b>0.0065</b>   |
|                                  | <i>hsa-miR-654-3p</i>               | <b>-3.15</b> | <b>0.0185</b>   |
|                                  | <i>hsa-miR-543</i>                  | <b>-2.83</b> | <b>0.0314</b>   |
|                                  | <sup>d</sup> <i>hsa-miR-370-3p</i>  | <b>-2.81</b> | <b>0.0407</b>   |
|                                  | <i>hsa-miR-409-3p</i>               | <b>-2.41</b> | <b>0.0040</b>   |
|                                  | <sup>f</sup> <i>hsa-miR-423-5p</i>  | <b>-2.38</b> | <b>9.48E-04</b> |
|                                  | <sup>c</sup> <i>hsa-miR-3184-3p</i> | <b>-2.35</b> | <b>0.0021</b>   |
|                                  | <i>hsa-miR-432-5p</i>               | <b>-2.27</b> | <b>0.0274</b>   |
|                                  | <i>hsa-miR-4792</i>                 | <b>-2.27</b> | <b>0.0188</b>   |
|                                  | <i>hsa-miR-493-5p</i>               | <b>-2.25</b> | <b>0.0201</b>   |

|                                     |                                    |              |                 |
|-------------------------------------|------------------------------------|--------------|-----------------|
|                                     | <sup>d</sup> hsa-miR-342-5p        | -2.21        | 0.0093          |
|                                     | <sup>d</sup> hsa-let-7c-5p         | -2.04        | 0.0041          |
|                                     | <b><sup>c</sup>hsa-miR-744-5p</b>  | <b>-1.94</b> | <b>0.0057</b>   |
|                                     | <sup>d</sup> hsa-let-7a-5p         | -1.93        | 0.0333          |
|                                     | hsa-let-7e-5p                      | -1.91        | 0.0403          |
|                                     | <sup>d</sup> hsa-miR-342-3p        | -1.86        | 0.0400          |
|                                     | <sup>d</sup> hsa-miR-374b-5p       | -1.82        | 0.0045          |
|                                     | hsa-miR-18a-5p                     | -1.79        | 0.0212          |
|                                     | <sup>c</sup> hsa-miR-26b-5p        | -1.49        | 0.0120          |
|                                     | <b><sup>d</sup>hsa-miR-320a</b>    | <b>-1.44</b> | <b>0.0138</b>   |
| <b>Downregulated in serum</b>       |                                    |              |                 |
|                                     | <b><sup>f</sup>hsa-miR-423-5p</b>  | <b>-3.78</b> | <b>3.44E-06</b> |
|                                     | <sup>f</sup> hsa-let-7d-5p         | -3.45        | 0.0058          |
|                                     | <sup>e</sup> hsa-miR-223-3p        | -3.23        | 0.0024          |
|                                     | <b><sup>c</sup>hsa-miR-4448</b>    | <b>-3.17</b> | <b>0.0472</b>   |
|                                     | <b>hsa-miR-199a-5p</b>             | <b>-3.04</b> | <b>0.0274</b>   |
|                                     | <sup>f</sup> hsa-let-7b-5p         | -3.04        | 2.98E-04        |
|                                     | <sup>e</sup> hsa-miR-26a-5p        | -2.71        | 0.0233          |
|                                     | <sup>c</sup> hsa-miR-26b-5p        | -2.56        | 0.0336          |
|                                     | <b><sup>c</sup>hsa-miR-744-5p</b>  | <b>-2.45</b> | <b>0.0245</b>   |
|                                     | <b><sup>c</sup>hsa-miR-3184-3p</b> | <b>-1.85</b> | <b>0.0419</b>   |
| <b>Downregulated in blood cells</b> |                                    |              |                 |
|                                     | <b>hsa-miR-485-3p</b>              | <b>-2.95</b> | <b>0.0025</b>   |

|  |                                         |              |                 |
|--|-----------------------------------------|--------------|-----------------|
|  | <i>hsa-miR-16-2-3p</i>                  | <b>-2.82</b> | <b>2.97E-11</b> |
|  | <sup>f</sup> hsa-let-7b-5p              | -2.74        | 1.58E-04        |
|  | hsa-miR-150-5p                          | -2.33        | 2.71E-06        |
|  | <b><i>hsa-miR-4732-3p</i></b>           | <b>-2.25</b> | <b>4.68E-09</b> |
|  | hsa-let-7i-5p                           | -2.22        | 4.00E-03        |
|  | <b><i>hsa-miR-3605-3p</i></b>           | <b>-2.19</b> | <b>2.31E-07</b> |
|  | <b><i>hsa-miR-3615</i></b>              | <b>-2.19</b> | <b>4.63E-06</b> |
|  | <b><i>hsa-miR-6833-3p</i></b>           | <b>-2.18</b> | <b>1.32E-04</b> |
|  | hsa-miR-574-5p                          | -2.13        | 2.15E-05        |
|  | <b><i>hsa-miR-4685-3p</i></b>           | <b>-2.12</b> | <b>1.00E-03</b> |
|  | <b><i>hsa-miR-1275</i></b>              | <b>-2.10</b> | <b>6.42E-04</b> |
|  | <b><i>hsa-miR-6803-3p</i></b>           | <b>-2.06</b> | <b>3.01E-04</b> |
|  | <b><i>hsa-miR-1306-5p</i></b>           | <b>-2.04</b> | <b>0.0101</b>   |
|  | <b><i>hsa-miR-6511a-3p</i></b>          | <b>-2.00</b> | <b>7.15E-05</b> |
|  | <b><i>hsa-miR-3940-3p</i></b>           | <b>-1.98</b> | <b>0.0116</b>   |
|  | hsa-miR-92b-3p                          | -1.96        | 2.50E-03        |
|  | <b><i>hsa-miR-6857-3p</i></b>           | <b>-1.94</b> | <b>0.0016</b>   |
|  | <b><i>hsa-miR-326</i></b>               | <b>-1.93</b> | <b>4.35E-05</b> |
|  | <b><i>hsa-miR-320d</i></b>              | <b>-1.92</b> | <b>4.36E-05</b> |
|  | <b><i>hsa-miR-6747-3p</i></b>           | <b>-1.92</b> | <b>1.70E-05</b> |
|  | <b><i>hsa-miR-4301</i></b>              | <b>-1.92</b> | <b>1.95E-03</b> |
|  | <sup>d</sup> <b><i>hsa-miR-320a</i></b> | <b>-1.90</b> | <b>3.29E-06</b> |
|  | <b><i>hsa-miR-328-3p</i></b>            | <b>-1.90</b> | <b>8.02E-06</b> |
|  | <b><i>hsa-miR-6511b-3p</i></b>          | <b>-1.89</b> | <b>1.33E-04</b> |
|  | hsa-miR-3173-5p                         | -1.87        | 4.52E-07        |



|  |                               |              |                        |
|--|-------------------------------|--------------|------------------------|
|  | <b><i>hsa-miR-320b</i></b>    | <b>-1.85</b> | <b><i>6.59E-06</i></b> |
|  | hsa-miR-210-5p                | -1.84        | 2.23E-03               |
|  | <b><i>hsa-miR-6786-3p</i></b> | <b>-1.80</b> | <b><i>2.39E-04</i></b> |
|  | hsa-miR-92a-3p                | -1.75        | 2.53E-03               |
|  | <b><i>hsa-miR-1976</i></b>    | <b>-1.75</b> | <b><i>1.51E-04</i></b> |
|  | hsa-miR-486-5p                | -1.73        | 4.03E-05               |
|  | <b><i>hsa-miR-636</i></b>     | <b>-1.71</b> | <b><i>6.45E-05</i></b> |
|  | <b><i>hsa-miR-6741-3p</i></b> | <b>-1.71</b> | <b><i>9.48E-04</i></b> |
|  | <b><i>hsa-miR-766-3p</i></b>  | <b>-1.68</b> | <b><i>0.0107</i></b>   |
|  | <sup>d</sup> hsa-let-7a-5p    | -1.64        | 0.0217                 |
|  | <b><i>hsa-miR-320c</i></b>    | <b>-1.64</b> | <b><i>7.19E-05</i></b> |
|  | <b><i>hsa-miR-4732-5p</i></b> | <b>-1.63</b> | <b><i>0.0230</i></b>   |
|  | <b><i>hsa-miR-6131</i></b>    | <b>-1.62</b> | <b><i>0.0126</i></b>   |
|  | <b><i>hsa-miR-942-5p</i></b>  | <b>-1.61</b> | <b><i>0.0011</i></b>   |
|  | <sup>d</sup> hsa-miR-342-3p   | -1.56        | 0.0207                 |
|  | <sup>d</sup> hsa-miR-342-5p   | -1.53        | 0.0263                 |
|  | <sup>f</sup> hsa-let-7d-5p    | -1.48        | 0.0215                 |
|  | hsa-miR-126-3p                | -1.48        | 0.0346                 |
|  | <sup>d</sup> hsa-let-7c-5p    | -1.46        | 0.0480                 |
|  | <b><i>hsa-miR-574-3p</i></b>  | <b>-1.44</b> | <b><i>0.0042</i></b>   |
|  | <b><i>hsa-miR-5010-3p</i></b> | <b>-1.42</b> | <b><i>0.0095</i></b>   |
|  | <sup>d</sup> hsa-miR-125b-5p  | -1.41        | 0.0182                 |
|  | <b><i>hsa-miR-1249-3p</i></b> | <b>-1.38</b> | <b><i>0.0019</i></b>   |
|  | <b><i>hsa-miR-6783-3p</i></b> | <b>-1.30</b> | <b><i>0.0058</i></b>   |
|  | <b><i>hsa-miR-937-3p</i></b>  | <b>-1.29</b> | <b><i>0.0081</i></b>   |

|  |                                    |              |               |
|--|------------------------------------|--------------|---------------|
|  | hsa-miR-93-3p                      | -1.29        | 0.0052        |
|  | <sup>d</sup> <i>hsa-miR-370-3p</i> | <b>-1.20</b> | <b>0.0295</b> |
|  | hsa-miR-18a-3p                     | -1.17        | 7.74E-04      |
|  | <i>hsa-miR-2110</i>                | <b>-1.13</b> | <b>0.0122</b> |
|  | <i>hsa-miR-532-3p</i>              | <b>-1.12</b> | <b>0.0045</b> |
|  | <i>hsa-miR-6842-3p</i>             | <b>-1.08</b> | <b>0.0180</b> |
|  | <sup>f</sup> <i>hsa-miR-423-5p</i> | <b>-1.06</b> | <b>0.0106</b> |
|  | <i>hsa-miR-296-5p</i>              | <b>-1.02</b> | <b>0.0084</b> |

<sup>a</sup>Log<sub>2</sub> fold change (Log<sub>2</sub>FC) of  $\geq |1|$ ; <sup>b</sup>adjusted p-value (P<sub>adj</sub>) of  $\leq 0.05$ ; <sup>c</sup>miRNA only present extracellularly in exosome and serum; <sup>d</sup>miRNA present in exosome and blood cells; <sup>e</sup>miRNA present in serum and blood cells; <sup>f</sup>miRNA present in all three matrices; bold italic: newly identified sepsis-associated miRNA candidates
